# Supplementary material for: Estimation of the Fraction of Spin-Correlated Radical Ion Pairs in Irradiated Alkanes using Magnetosensitive Recombination Luminescence from Exciplexes Generated upon Recombination of a Probe Pair
Source: publisher site journal article supplement (doi:10.1515/zpch-2016-0819), 2016-09-28
Supplement: Supplementary file 1 [file Supp_Infor.pdf › Supp_Infor.pdf]

# Supporting Information

## 1. Experimental spectra of magnetosensitive radiation-generated recombination luminescence for the 11 alkanes

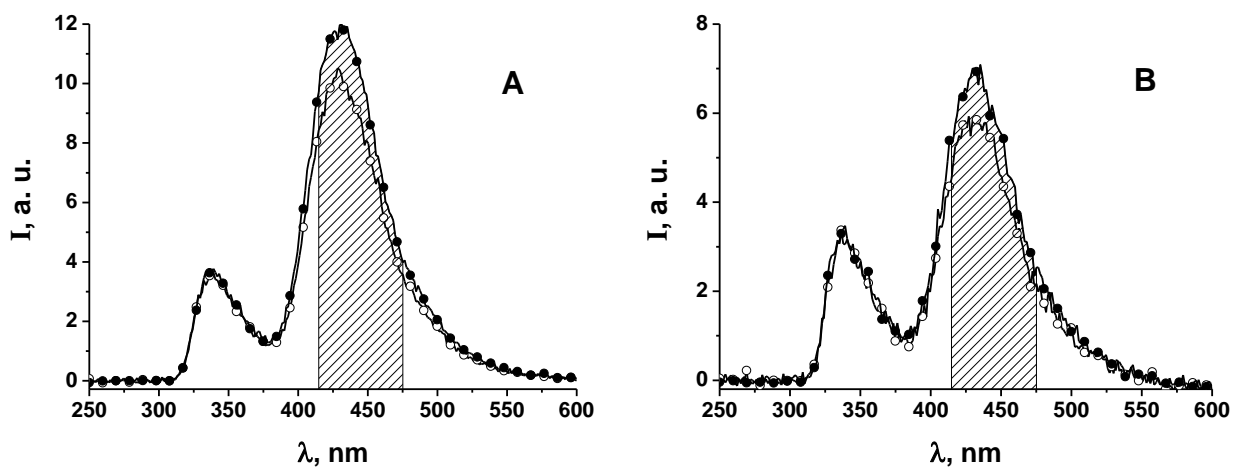

**Figure S11:** Spectra of X-ray generated luminescence for a mixture of  $6 \cdot 10^{-3}$  M 1-(phenylethynyl)-4-(trifluoromethyl)benzene and  $1 \cdot 10^{-2}$  M DMA in two cyclic alkanes in applied magnetic field 20 mT (●) and in zero field (○): **A** – cyclohexane,  $\chi_E = 17.3 \pm 0.5\%$ ; **B** - methylcyclohexane,  $\chi_E = 16.2 \pm 0.6\%$ . Magnetic field effect was determined in the marked wavelength range.

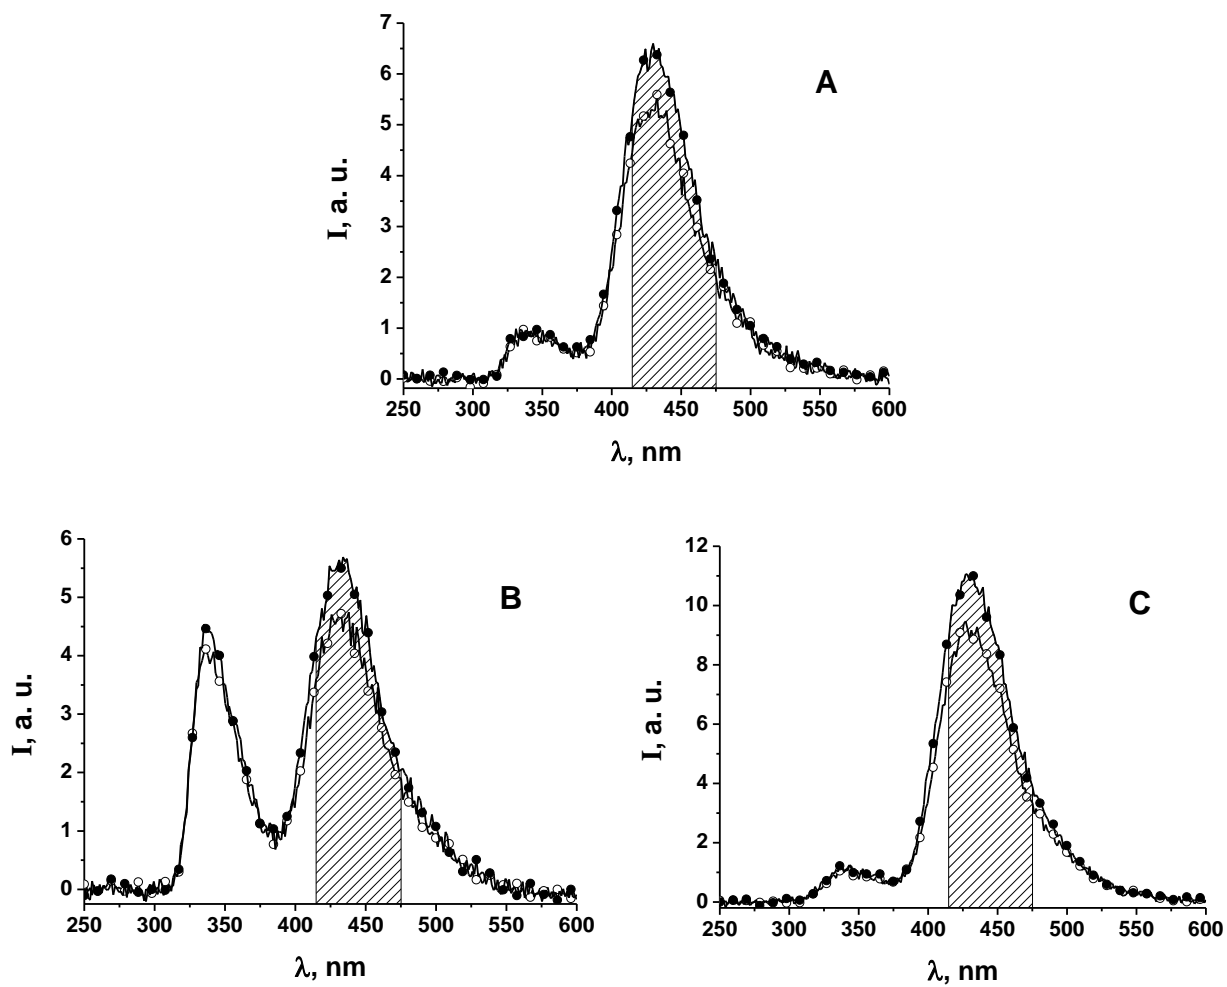

**Figure SI2:** Spectra of X-ray generated luminescence for a mixture of  $6 \cdot 10^{-3}$  M 1-(phenylethynyl)-4-(trifluoromethyl)benzene and  $1 \cdot 10^{-2}$  M DMA in three branched alkanes in applied magnetic field 20 mT (●) and in zero field (○): **A** – 2,3-dimethylbutane,  $\chi_E = 20.3 \pm 0.5\%$ ; **B** – squalane,  $\chi_E = 18.1 \pm 0.6\%$ ; **C** – isooctane,  $\chi_E = 19.1 \pm 0.5\%$ . Magnetic field effect was determined in the marked wavelength range.

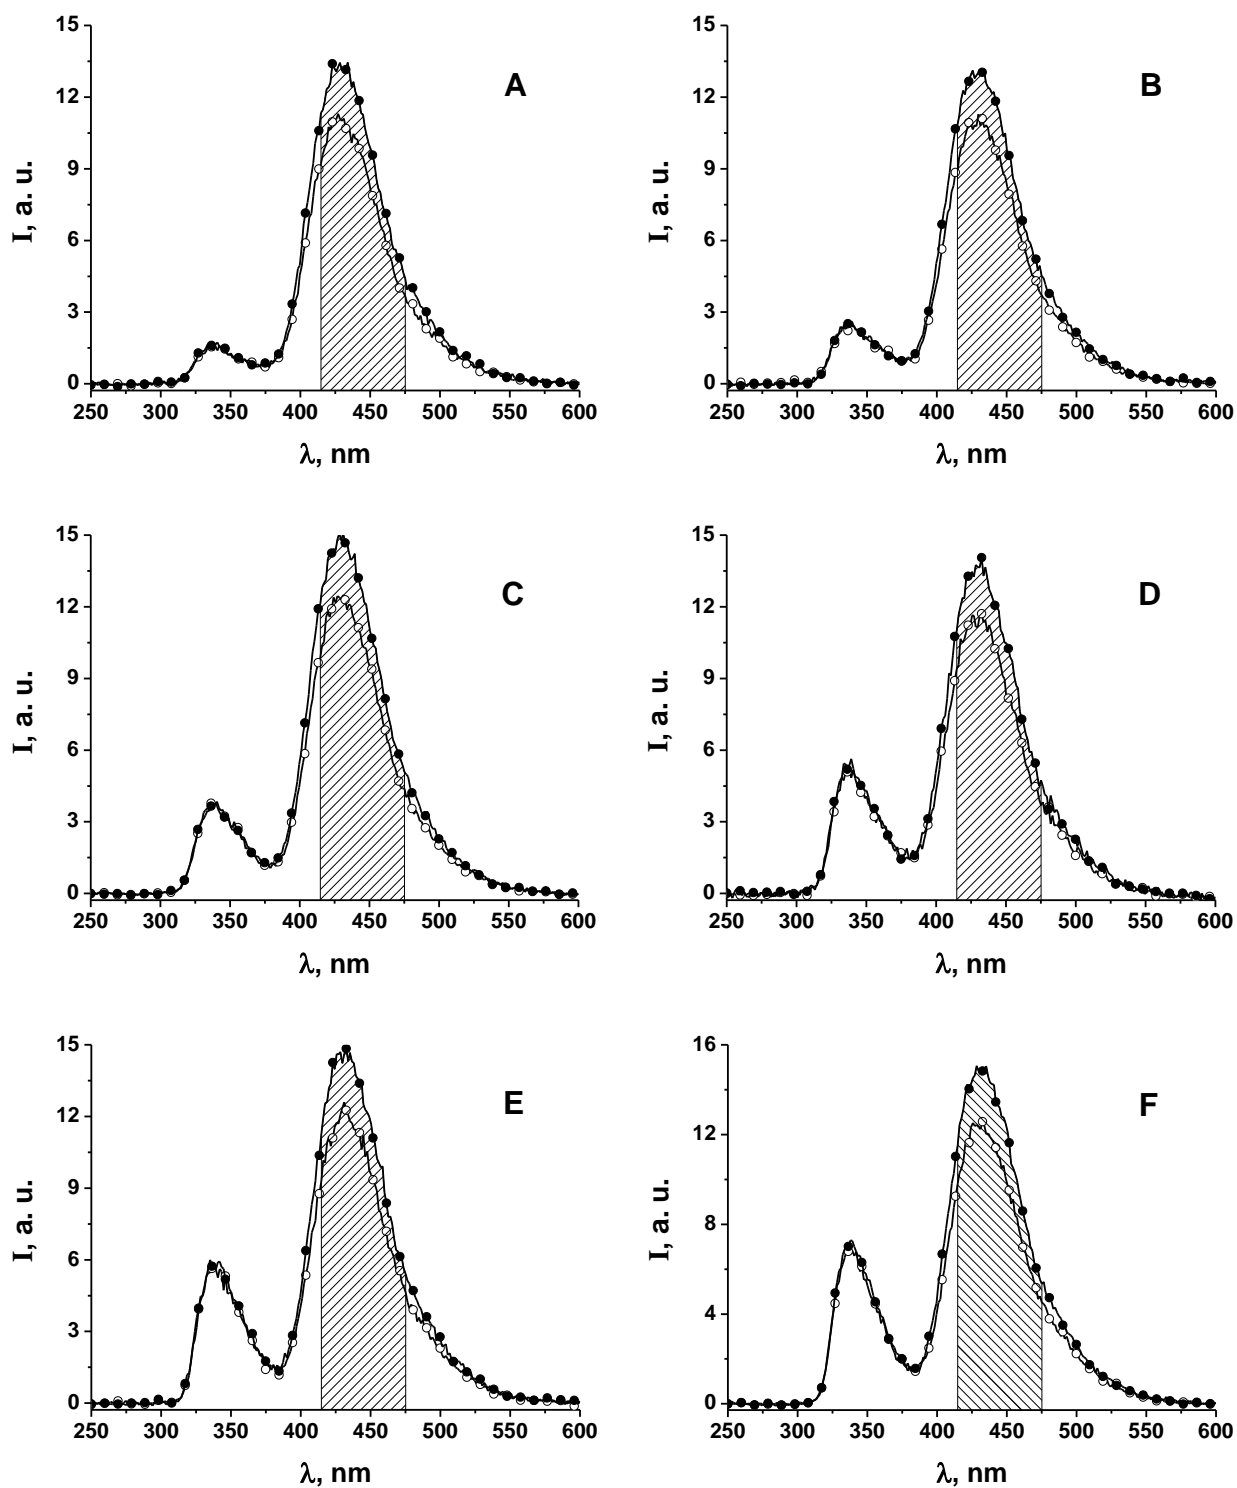

**Figure SI3:** Spectra of X-ray generated luminescence for a mixture of  $6 \cdot 10^{-3}$  M 1-(phenylethynyl)-4-(trifluoromethyl)benzene and  $1 \cdot 10^{-2}$  M DMA in six linear alkanes in applied magnetic field 20 mT (●) and in zero field (○): **A** – *n*-hexane,  $\chi_E = 19.6 \pm 0.7\%$ ; **B** – *n*-heptane,  $\chi_E = 19.2 \pm 0.2\%$ ; **C** – *n*-octane,  $\chi_E = 19.4 \pm 0.7\%$ ; **D** – *n*-decane,  $\chi_E = 19.3 \pm 0.4\%$ ; **E** – *n*-dodecane,  $\chi_E = 19.8 \pm 0.6\%$ ; **F** – *n*-hexadecane,  $\chi_E = 19.6 \pm 0.5\%$ . Magnetic field effect was determined in the marked wavelength range.

## 2. Characterization of synthesized 1-(phenylethynyl)-4-(trifluoromethyl)benzene

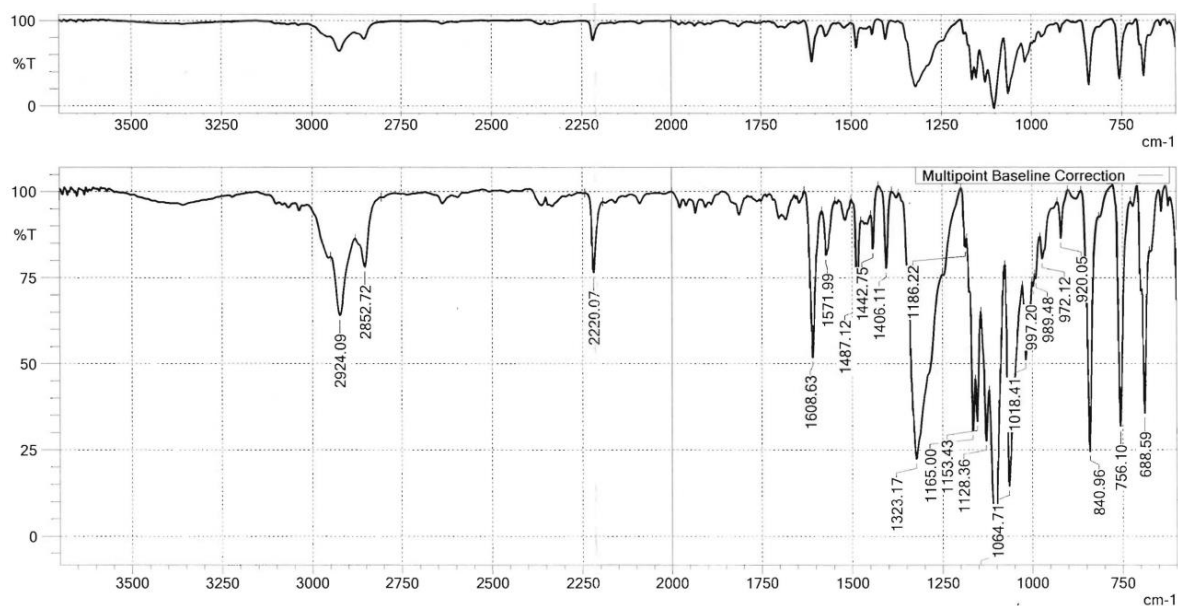

**Figure SI4:** FTIR spectrum for a crystal of 1-(phenylethynyl)-4-(trifluoromethyl)benzene.

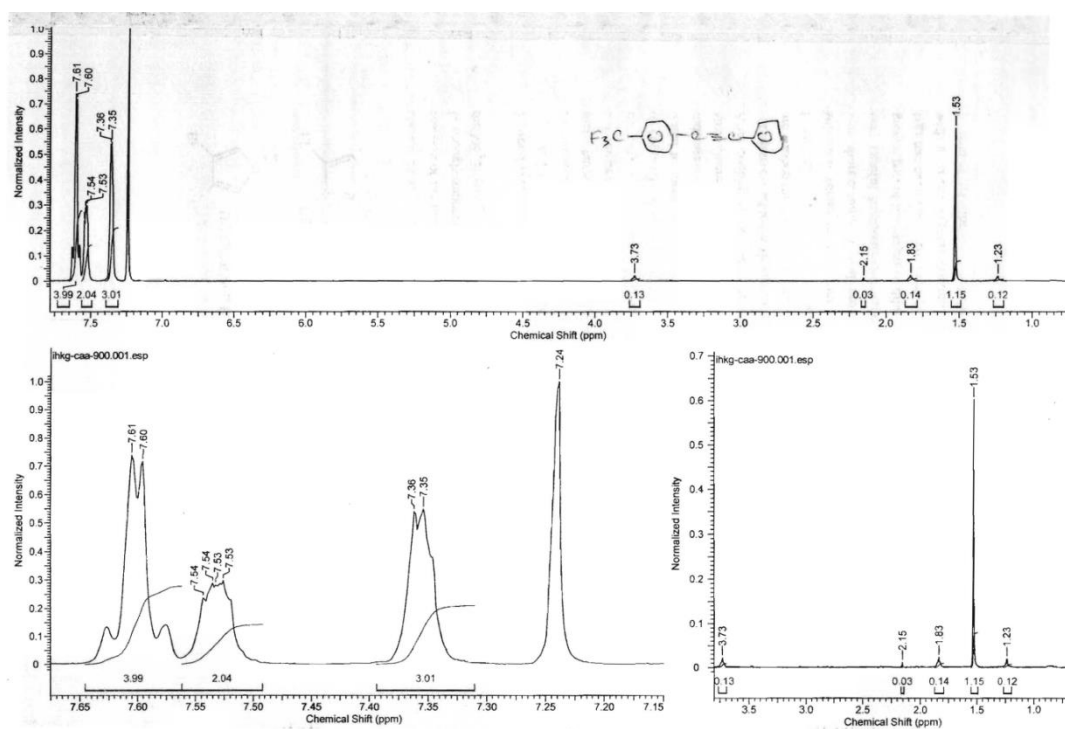

**Figure SI5:**  $^1\text{H}$  NMR spectra of 1-(phenylethynyl)-4-(trifluoromethyl)benzene solution in  $\text{CDCl}_3$ . The peaks at 1.53 ppm, ( $\text{H}_2\text{O}$ ), 1.23 ppm, 1.83 ppm, 2.15 ppm, 3.73 ppm ( $\text{CHCl}_3$ ) are due to minor impurities in the solvent (see the spectrum of “pure”  $\text{CDCl}_3$  in Figure SI6 below).

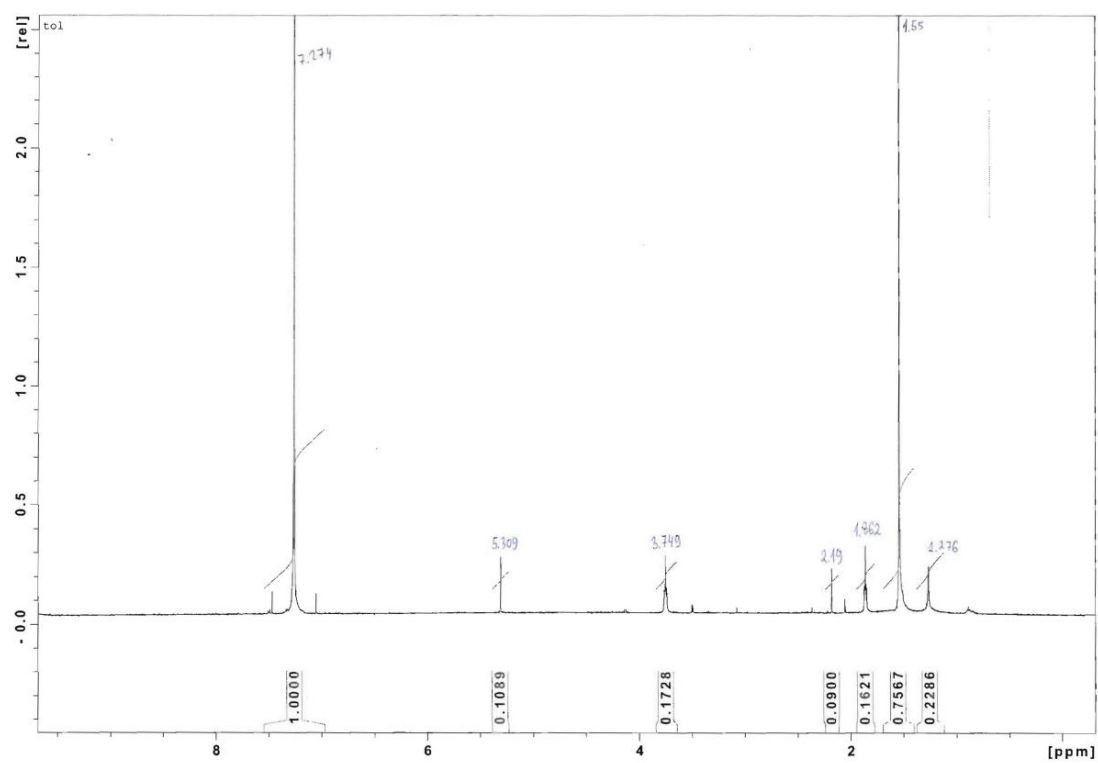

**Figure SI6:**  $^1\text{H}$  NMR spectrum of  $\text{CDCl}_3$  used to take NMR spectrum of the synthesized compound.
